# Supplementary material for: Apparent climate-mediated loss and fragmentation of core habitat of the American pika in the Northern Sierra Nevada, California, USA
Source: PLoS One. 2017 Aug 30;12(8):e0181834. doi: 10.1371/journal.pone.0181834 (PMC5576638; doi:10.1371/journal.pone.0181834)
Supplement: S3 Table — AICc model comparison of 10 models of pika site occupancy in the north Lake Tahoe area. MST_min_1k is minimum mean summer temperature within 1 km of the site centroid; log_talus_area is log transformed talus area within 1 km of the site centroid. (XLSX) [file pone.0181834.s006.xlsx]

## Sheet: Sheet1
S3 Table. AICc model comparison of 10 models of pika site occupancy in the north Tahoe area. MST_min_1km is minimum mean summer temperature within 1 km of the site centroid; log_talus_area is log transformed talus area within 1 km of the site centroid.
Model	ΔAICc	AICcWeight
MST_min_4km	0	0.52
MST_min_3km + log_talus_area	2.37	0.16
MST_min_5km + log_talus_area	2.37	0.16
MST_min_4km + log_talus_area	2.37	0.16
MST_min_3km	9.66	0
MST_min_5km	9.92	0
MST_min_2km + log_talus_area	10.41	0
MST_min_2km	15.22	0
MST_min_1km	19.06	0
MST_min_1km + log_talus_area	19.85	0
Null Model	48.38	0
